# Supplementary material for: Application of electrospray ionization mass spectrometry for the evaluation of alkaloids binding to G-quadruplex of HIV-1 integrase inhibitors
Source: Royal Society of Chemistry journal article supplement (doi:10.1039/c3ay41494a), 2013-11-19
Supplement: c3ay41494a.pdf [file c3ay41494a.pdf]

### Electronic Supplementary Information

## Application of Electrospray Ionization Mass Spectrometry for the Evaluation of Alkaloids Binding to G-quadruplex of HIV-1 Integrase Inhibitors

Run Hao,<sup>a</sup> Yameng Liu<sup>a</sup> and Rugang Zhong<sup>\*a</sup>

Department of Life Science and Bioengineering, Beijing University of Technology, Beijing, China

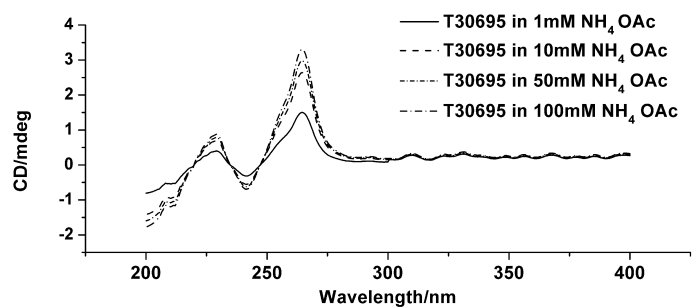

a

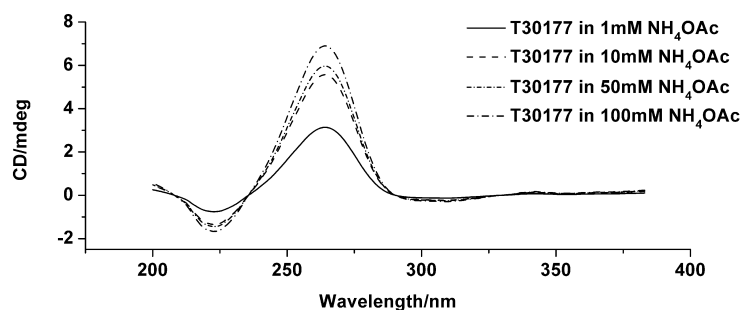

b

Fig. S1 CD spectra of T30695 (a) and T30177 (b) in different concentrations of NH<sub>4</sub>OAc buffer

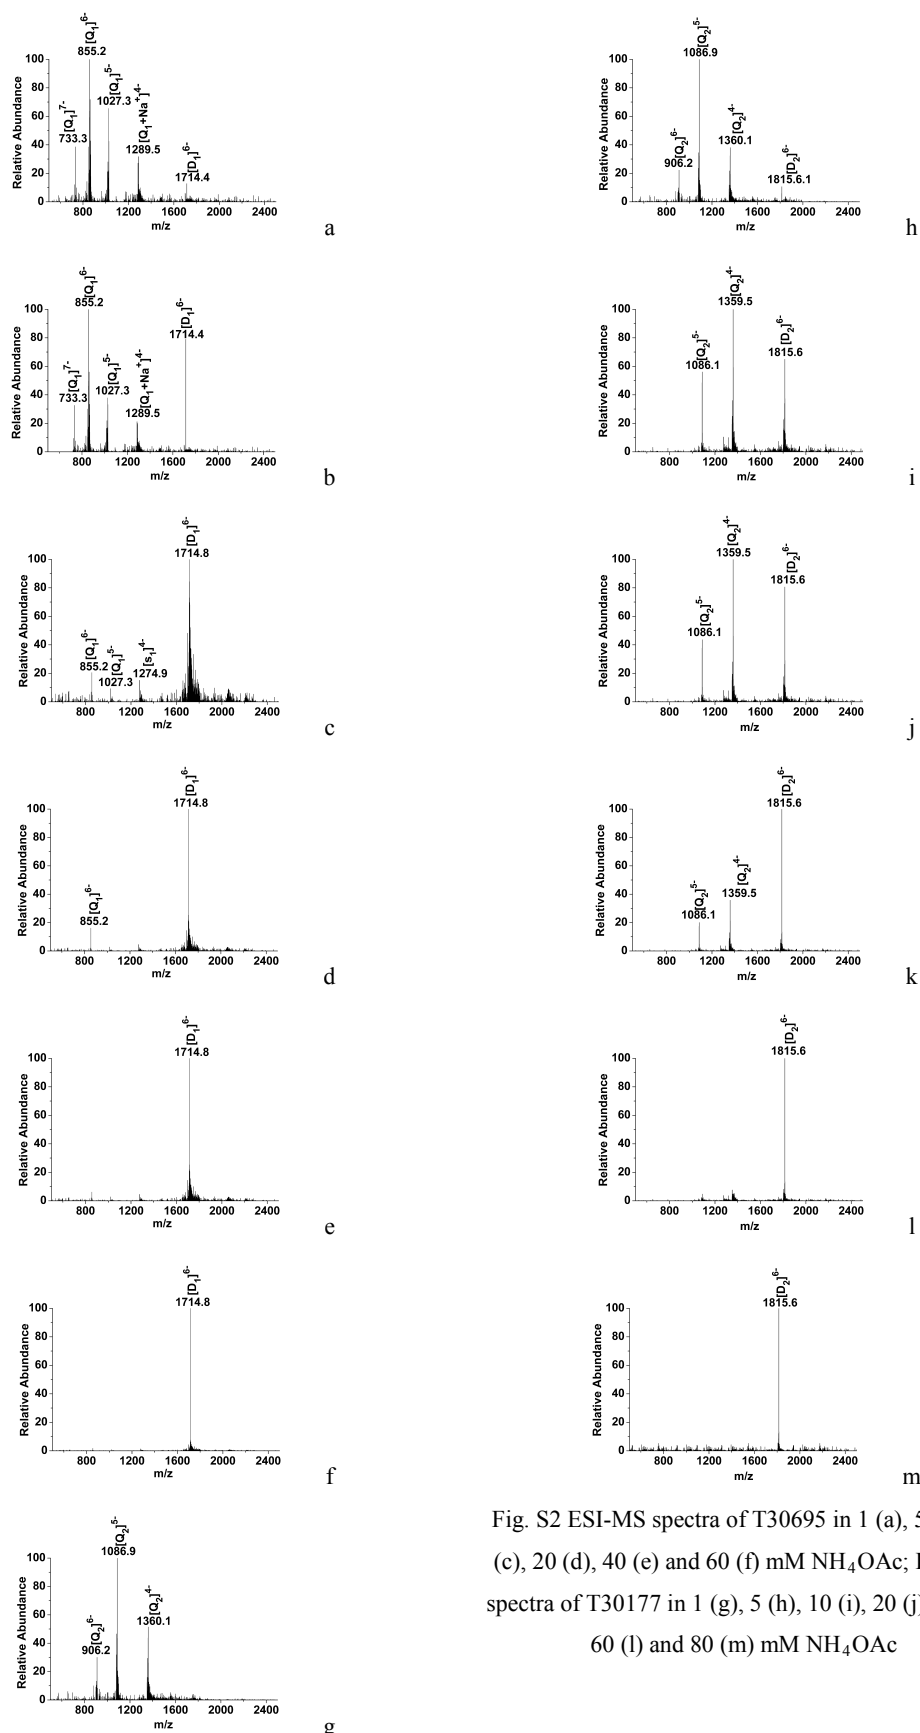

Fig. S2 ESI-MS spectra of T30695 in 1 (a), 5 (b), 10 (c), 20 (d), 40 (e) and 60 (f) mM  $\text{NH}_4\text{OAc}$ ; ESI-MS spectra of T30177 in 1 (g), 5 (h), 10 (i), 20 (j), 40 (k), 60 (l) and 80 (m) mM  $\text{NH}_4\text{OAc}$

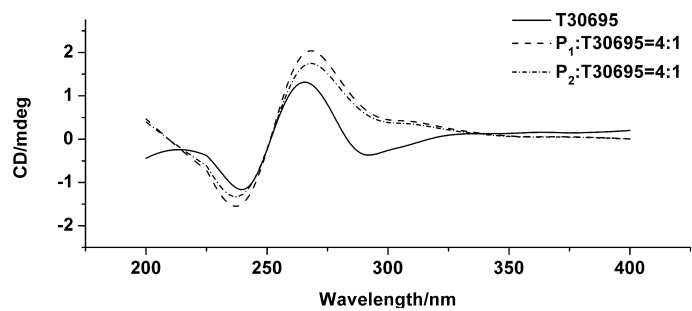

a

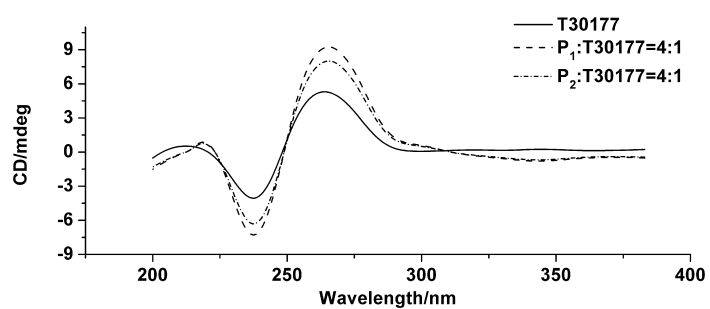

b

Fig. S3 CD spectra of P<sub>1</sub> and P<sub>2</sub> with T30695 (a) and T30177 (b) at a molar ratio of 4:1 in the absence of NH<sub>4</sub><sup>+</sup>
